# Supplementary material for: Efficient production of adenovirus vector lacking genes of virus-associated RNAs that disturb cellular RNAi machinery
Source: PubMed Central journal article supplement — Sci Rep. 2013 Jan 25;3:1136. doi: 10.1038/srep01136 (PMC3555086; doi:10.1038/srep01136), 2013-01-25
Supplement: srep01136-s1.pdf [file srep01136-s1.pdf]

## **Supplementary Information**

Efficient production of adenovirus vector lacking genes of virus-associated RNAs that disturb cellular RNAi machinery

**Aya Maekawa<sup>1</sup>, Zheng Pei<sup>1</sup>, Mariko Suzuki<sup>1</sup>, Hiromitsu Fukuda<sup>1,2</sup>, Yohei Ono<sup>1</sup>, Saki Kondo<sup>1</sup>, Izumu Saito<sup>1</sup> & Yumi Kanegae<sup>1\*</sup>**

<sup>1</sup>Laboratory of Molecular Genetics, Institute of Medical Science, University of Tokyo, Minato-ku, Tokyo, Japan, <sup>2</sup>Present address: Japan Animal Referral Medical Center, 2-5-8 Kuji, Takatsu-ku, Kawasaki-shi, Kanagawa 213-0032, Japan, correspondence and requests for materials should be addressed to Y.K (kanegae@ims.u-tokyo.ac.jp).

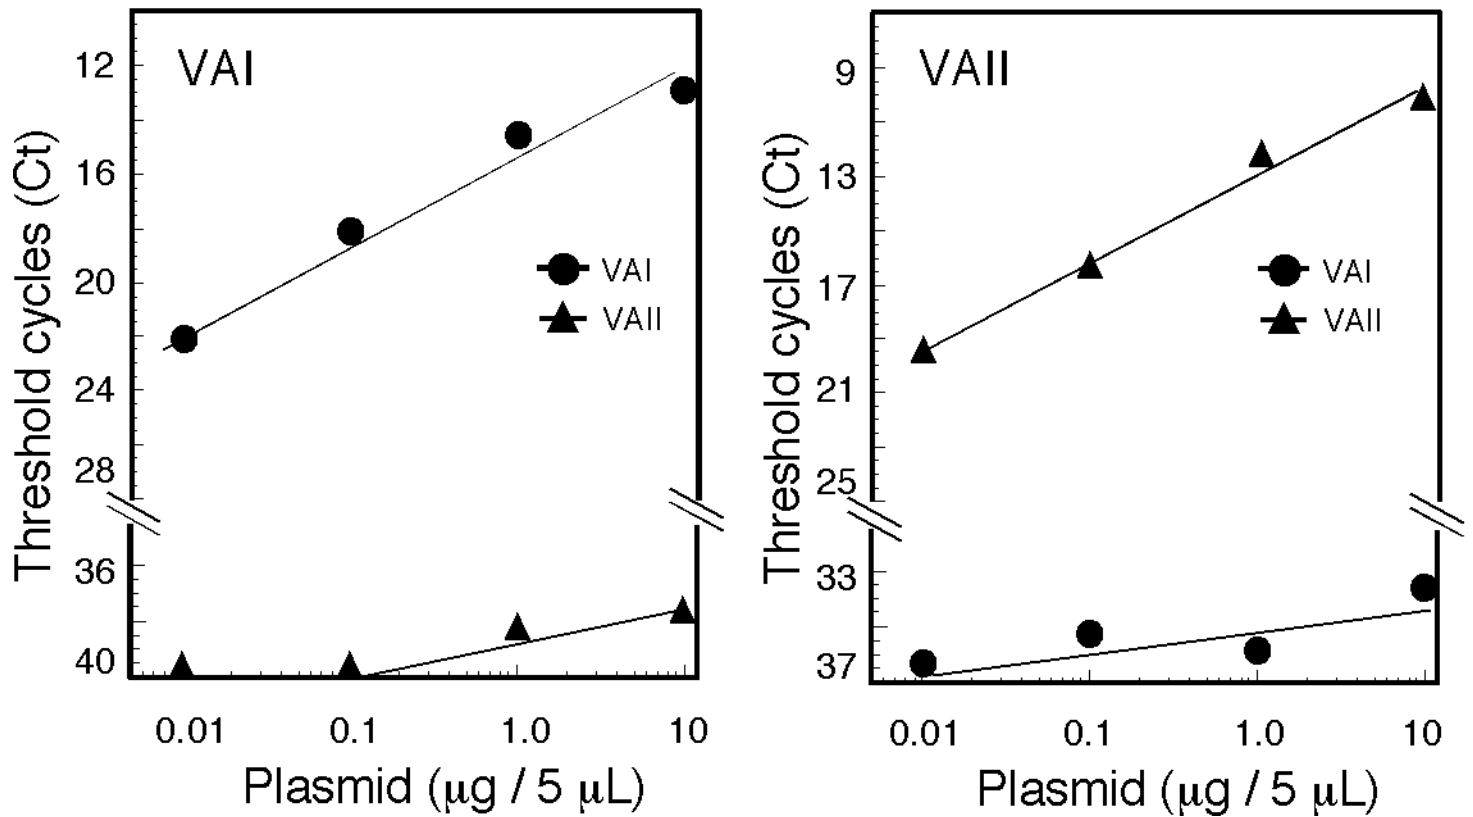

**Supplementary Figure S1. Specificity of the VAI- and VAII-specific probes.** VAI and VAII genes respectively in the diluted DNA of plasmids were detected using the VAI probe (prVAI-3) and the VAII probe (prVAII-2). Since the sensitivity of VAI and VAII probes are different, the Ct values are not identical.

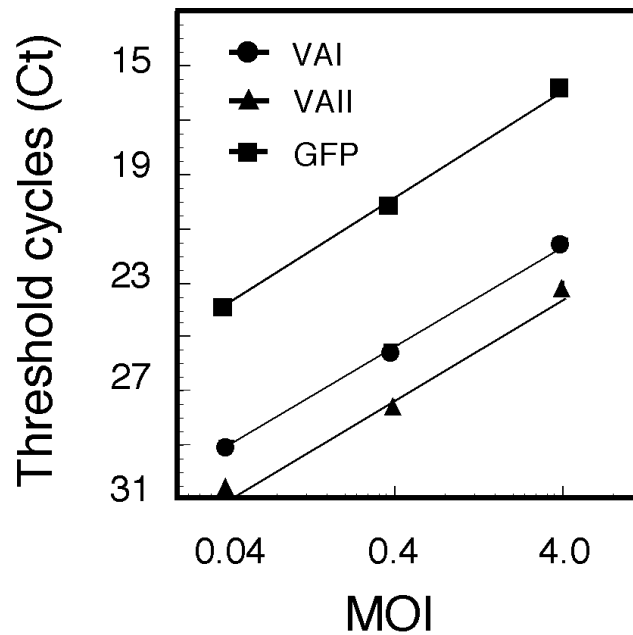

**Supplementary Figure S2. Correlation between the amounts of infected vector and Ct values using qPCR.** Linear correlations were observed, indicating that the copy numbers of VA RNAs and GFP mRNA and their ratios in Table 3 can be obtained by measuring the Ct values (Pei, Z., Kondo, S., Kanegae, Y. & Saito, I. Copy number of adenoviral vector genome transduced into target cells can be measured using quantitative PCR: application to vector titration. *Biochem. Biophys. Res. Commun.* **417**, 945-950, (2012).
